# Supplementary material
Source: Springer Nature journal article supplement (https://www.springermedizin.de/resource/supplementary/12885_2012_3682_MOESM1_ESM.pdf/9464144)

BM2

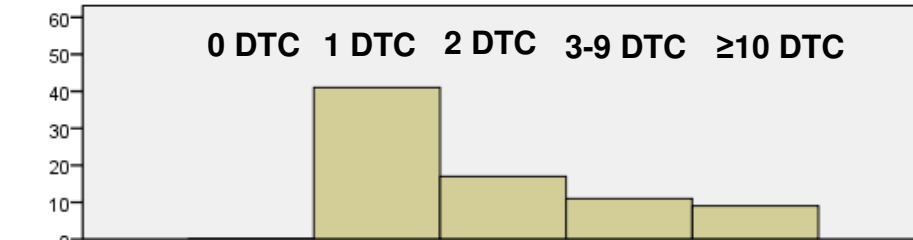

BM3

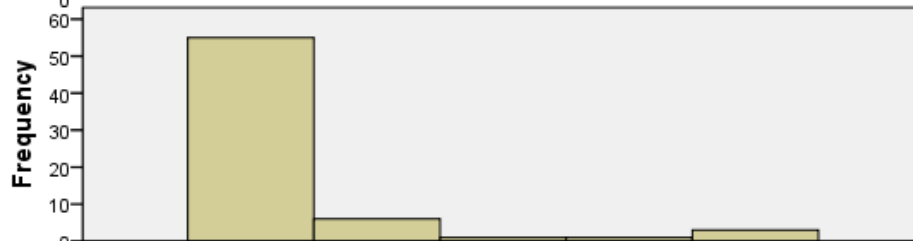

BM4

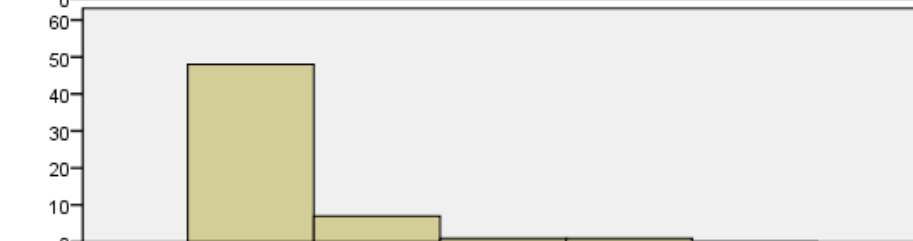

Supplement: MOESM1 [file 9464144]
